# Supplementary material for: There's an App for That: Development of an Application to Operationalize the Global Diet Quality Score
Source: PubMed Central journal article supplement (PMC8542098; doi:10.1093/jn/nxab196), 2021-10-23

There's an app for that: development of an application to operationalize the Global Diet Quality Score. Mourad Moursi. Online Supplementary Material.

Supplemental Figure 1. Illustration of the 10 cubes

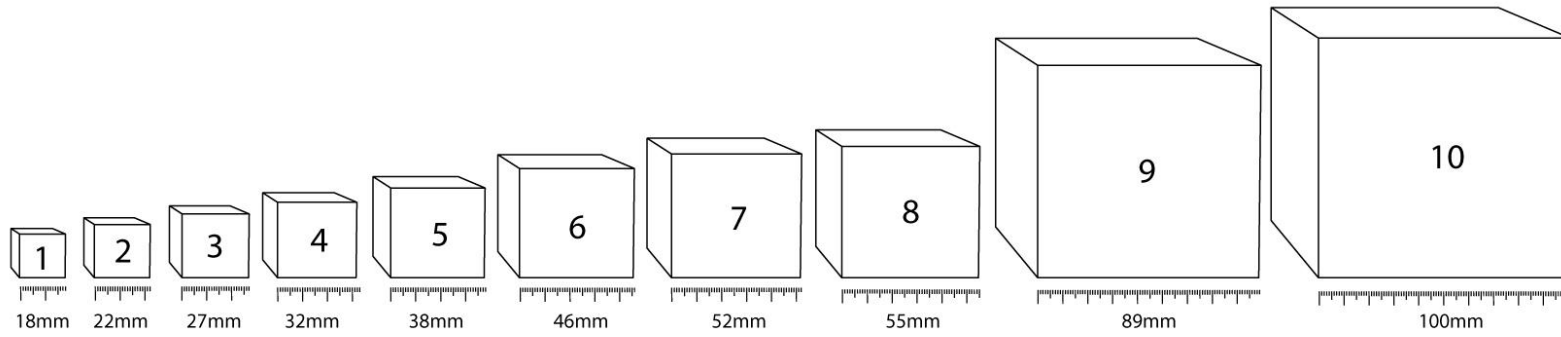

Supplement: nxab196_supplemental_figure_1.pdf [file nxab196_supplemental_figure_1.pdf]
